# Supplementary material for: Preparation of Hot-Melt Extruded Dosage Form for Enhancing Drugs Absorption Based on Computational Simulation
Source: MDPI journal article supplement (doi:10.3390/pharmaceutics12080757), 2020-08-11
Supplement: s1 [file s1]

# Preparation of Hot-Melt Extruded Dosage Form for Enhancing Drugs Absorption Based on Computational Simulation

Sung-Min Choi, Sung-Hoon Lee, Chin-Yang Kang and Jun-Bom Park

Cilostazol calibration curve

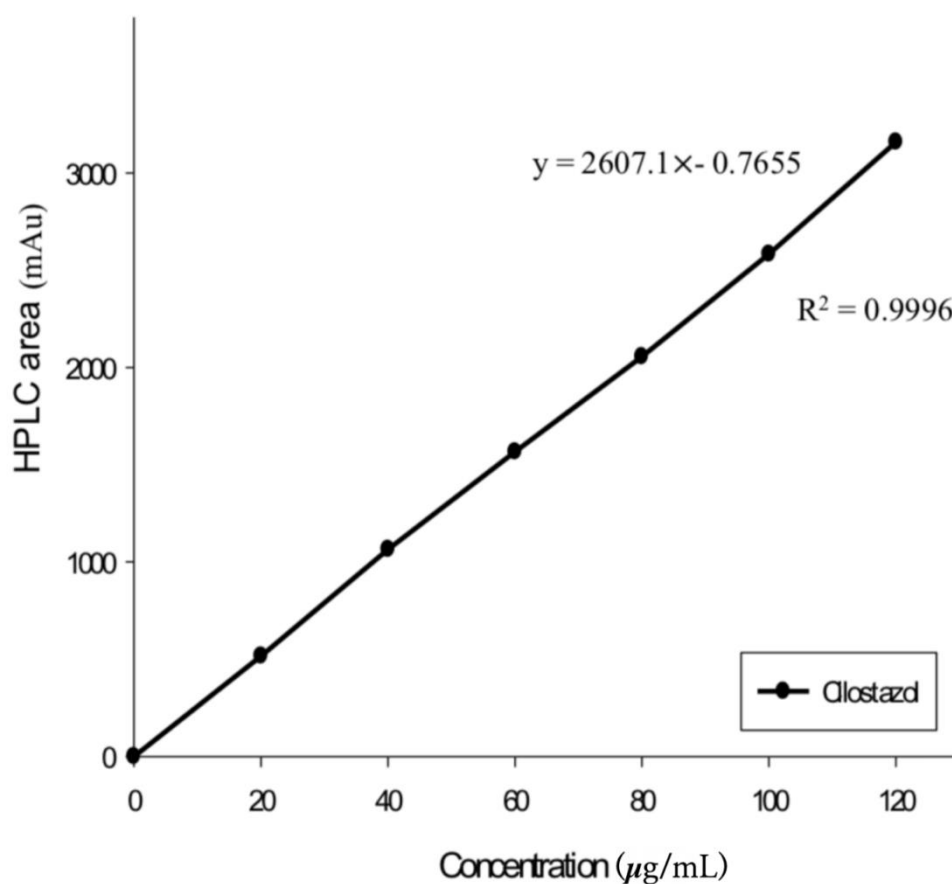

**Figure S1.** The linearity of the calibration curve with HPLC method, ranging from 20 µg/mL to 120 µg/mL.
